# Altered functional interactions between neurons in primary visual cortex of macaque monkeys with experimental amblyopia

Katerina Acar<sup>2,4</sup> Lynne Kiorpes<sup>3</sup> J. Anthony Movshon<sup>3</sup> and Matthew A. Smith<sup>1,2</sup>

<sup>1</sup> Department of Ophthalmology and Department of Bioengineering, University of Pittsburgh, Pittsburgh PA 15213

<sup>2</sup> Center for the Neural Basis of Cognition, University of Pittsburgh, Pittsburgh PA 15213

<sup>3</sup> Center for Neural Science, New York University, New York, NY 10003

<sup>4</sup> Center for Neuroscience, University of Pittsburgh, Pittsburgh, PA 15213

**Correspondence:** Matthew A. Smith  
Department of Ophthalmology  
University of Pittsburgh  
203 Lothrop St  
Eye and Ear Institute, Room 914  
Pittsburgh, PA 15213  
Phone: (412) 647-2313  
Fax: (412) 647-5880  
E-mail: matt@smithlab.net

**Acknowledgements:** KA was supported by a National Science Foundation (NSF) Graduate Fellowship Grant 1747452, MAS was supported by National Institutes of Health (NIH) grants R00EY018894, R01EY022928, R01MH118929, R01EB026953, P30EY008098, NSF grant NCS 1734901, a career development grant and an unrestricted award from Research to Prevent Blindness, and the Eye and Ear Foundation of Pittsburgh. LK, JAM, and the creation and testing of the amblyopic subjects were supported by NIH grant R01EY05864 to LK and P51 OD010425 to the Washington National Primate Research Center. We are grateful to Michael Gorman for his assistance rearing and behaviorally testing animals, to Howard M. Eggers for creating experimental strabismus, and to Romesh Kumbhani, Najib Majaj, Yasmine El-Shamayleh and others in the Movshon laboratory for their assistance during recording experiments.

## 37 **Abstract**

38 Amblyopia, a disorder in which vision through one of the eyes is degraded, arises because of deficient processing  
39 of information by the visual system. Amblyopia often develops in humans after early misalignment of the eyes  
40 (strabismus), and can be simulated in macaque monkeys by artificially inducing strabismus. In such amblyopic  
41 animals, single-unit responses in primary visual cortex (V1) are appreciably reduced when evoked by the  
42 amblyopic eye compared to the other (fellow) eye. However, this degradation in single V1 neuron responsivity is  
43 not commensurate with the marked losses in visual sensitivity and resolution measured behaviorally. Therefore,  
44 in this study we explored the idea that changes in the pattern of coordinated activity across a population of V1  
45 neurons may additionally contribute to degraded visual representations in amblyopia, potentially making it more  
46 difficult to read out visually evoked activity to support perceptual decisions. We recorded the activity of V1  
47 neuronal populations in three macaques (*M. nemestrina*) with strabismic amblyopia, and in one control. As  
48 reported previously, overall activity evoked through the amblyopic eye was diminished. We studied the functional  
49 interactions among V1 neurons responding to fellow or amblyopic eye stimulation by measuring spike count  
50 correlation in responses of pairs of neurons to identical visual stimuli. We found elevated correlation in neuronal  
51 responses to stimuli shown to the amblyopic eye that was independent of contrast level, unlike the fellow eye or  
52 typical cortex. Furthermore, the magnitude of this difference in correlation varied with the tuning and eye  
53 preferences of the neurons. As expected, these changes in strength and pattern of correlated activity diminished  
54 the ability of a standard decoding analysis to correctly identify visual stimuli. Overall, our results suggest that a  
55 part of the diminished visual capacity of amblyopes may be due to changes in the patterns of functional  
56 interaction among neurons in the primary visual cortex.

57

## 58 Introduction

59 Normal visual system development is dependent on having unobstructed and balanced binocular visual  
60 experience during early life. Amblyopia is a disorder of the visual system which often arises when visual input  
61 through the two eyes is imbalanced, most commonly through a misalignment of the two eyes (strabismus) or  
62 anisometropia (unilateral blur), during a critical window for development. Amblyopic individuals show major  
63 impairments in basic spatial vision in the affected eye, including decreased visual acuity and diminished contrast  
64 sensitivity that is particularly acute at high spatial frequencies (*Hess & Howell, 1977; Levi & Harwerth 1977;*  
65 *Bradley & Freeman, 1981; McKee et al., 2003; Levi, 2013*). Furthermore, several studies suggest that amblyopia  
66 is detrimental to cognitive processes that rely on higher visual system function, namely contour integration, global  
67 motion sensitivity, visual decision-making, and visual attention (*Farzin & Norcia, 2011; Hou et al., 2016; Kozma*  
68 *& Kiorpes 2003; Kiorpes, Tang & Movshon, 2006; Levi & Rislove, 2007; Meier et al., 2016; Pham et al., 2018;*  
69 *for review see Kiorpes, 2006 and Hamm et al., 2014*). Deficits in amblyopic vision originate from altered neural  
70 activity in the primary visual cortex (V1), and cortical areas downstream of V1, rather than from abnormalities in  
71 the eye or the visual thalamus (*Kiorpes et al., 1998; Blakemore & Vital-Durand, 1986; Levitt, et al.,*  
72 *2001; Movshon et al., 1987; Bi et al. 2011; Shooner et al., 2015; for review see Levi, 2013 and Kiorpes 2016*).

73 Previous studies using animal models of amblyopia provide evidence for some functional reorganization  
74 of ocular dominance in amblyopic V1 (*Adams et al., 2013 & 2015; Horton, Hocking & Kiorpes, 1997; Hendrickson*  
75 *et al, 1987; Fenstemaker et al. 1997; Levay, Wiesel & Hubel, 1980*), including a significant loss in the proportion  
76 of binocularly activated cells and – in severe amblyopia – a reduced proportion of neurons that respond to  
77 amblyopic eye stimulation (*Crawford et al., 1996; Smith et al., 1997; Kiorpes et al. 1998; Crawford & Harwerth*  
78 *2004; Schröder et al., 2002; Shooner et al., 2015*). Additionally, several studies report changes in spatial  
79 frequency tuning, as well as a loss of contrast sensitivity in some V1 neurons that receive input from amblyopic  
80 eye in monkeys (*Movshon et al., 1987; Kiorpes et al., 1998*) and in cats (*Crewther & Crewther 1990; Chino et*  
81 *al., 1983*). Overall, these changes in the functional properties of V1 neurons suggest that the representation of  
82 visual input from the amblyopic eye across the cortical neuronal population is distorted.

83 Early studies on the neural basis of amblyopia hypothesized that the perceptual deficits in amblyopes  
84 arise directly from corresponding losses in responsivity of single neurons in primary visual cortex. However, it is  
85 now clear that the magnitude of these single neuron changes cannot account for the entirety of spatial vision

86 deficits revealed by behavioral assessments of amblyopes (*Kiorpes et al., 1998; Shooner et al., 2015*). There  
87 are two additional neurophysiological mechanisms that could contribute to amblyopia: (1) neural deficits more  
88 profound than those seen in V1 may arise in downstream visual areas (*Kiorpes et al. 1998; Kiorpes 2016; El-*  
89 *Shamayleh et al., 2010; Bi et al., 2011; Wang et al., 2017*) and (2) impaired visual representation might result  
90 from changes in the structure of activity in populations of V1 neurons (*Shooner et al., 2015; Kiorpes, 2016;*  
91 *Roelfsema et al., 1994*).

92 Here we seek evidence for this second mechanism, and investigate whether activity correlations between  
93 neurons are altered in amblyopic V1 during visual stimulus processing. We recorded from populations of V1  
94 neurons in macaque monkeys that had developed amblyopia as a result of surgically-induced strabismus (*as in*  
95 *Kiorpes et al., 1998*). We measured correlation in the trial-to-trial variability (hereafter referred to as “correlation”)  
96 in the responses of pairs of neurons to an identical visual stimulus presented to either the non-amblyopic (fellow)  
97 or amblyopic, deviating eye. Similar to the firing rate of single neurons, the strength of correlated variability in  
98 normal visual cortex has been shown to change due to a number of factors, including the contrast of a visual  
99 stimulus (*Smith & Kohn 2005*), the animal’s attentional state (*Cohen & Maunsell, 2009; Mitchell et al., 2009;*  
100 *Snyder et al., 2016*), and over the course of perceptual learning (*Gu et al., 2011; Ni et al., 2018*). In our  
101 experiments, comparing correlation measurements for stimuli presented to the two eyes allowed us to determine  
102 whether the functional circuitry used for processing amblyopic eye visual input is altered compared to that  
103 supporting fellow eye processing. We found that correlation indeed changes depending on which eye receives  
104 the visual stimulus, an effect that was not present in a control animal. Overall, stimuli presented to the amblyopic  
105 eye evoked correlations that were more prominent in pairs of neurons with similar orientation tuning and eye  
106 preference. When stimulus contrast was increased, pairs of neurons driven through the fellow eye tended to  
107 decorrelate, whereas the high levels of correlation remained elevated for neurons driven by the affected eye.  
108 Our findings are consistent with the hypothesis that the abnormalities in amblyopic vision may in part be  
109 explained by changes in the strength and pattern of functional interactions among neurons in primary visual  
110 cortex.

## 111 **Materials and Methods**

112 *Subjects.* We studied four adult macaque monkeys (*Macaca nemestrina*), three female and one male. One  
113 animal remained a visually normal, untreated control while three of the animals developed strabismic amblyopia  
114 as a result of surgical intervention at 2-3 weeks of age. Specifically we resected the medial rectus muscle and  
115 transected the lateral rectus muscle of one eye in order to induce strabismus. All of the animals underwent  
116 behavioral testing to verify the presence or absence of amblyopia. All procedures were approved by the  
117 Institutional Animal Care and Use Committee of New York University and were in compliance with the guidelines  
118 set forth in the United States Public Health Service Guide for the Care and Use of Laboratory Animals.

119 *Behavioral testing.* We tested the visual sensitivity of each animal by evaluating their performance on a spatial  
120 two-alternative forced-choice detection task. Behavioral testing was conducted at the age of 1.5 years or older,  
121 and the acute experiments took place at the age of 7 years or older. On each trial in this task, a sinusoidal grating  
122 was presented on the left or the right side of a computer screen while the animal freely viewed the screen. The  
123 animal had to correctly indicate the location of the grating stimulus by pressing the corresponding lever in order  
124 to receive a juice reward. The gratings varied in spatial frequency and contrast level: we tested 5 contrast levels  
125 at each of 3-6 different spatial frequencies and collected at least 40 repeats of each stimulus combination. For  
126 each eye, we then determined the lowest contrast the animal could detect at each spatial frequency (threshold  
127 contrast) and constructed contrast sensitivity functions for each animal's right and left eyes. A detailed account  
128 of the procedures we used for behavioral assessment in this study can be found in previous reports (*Kiorpes,*  
129 *Tang & Movshon, 1999; Kozma & Kiorpes, 2003*).

130 *Electrophysiological recording.* The techniques we used for acute physiological recordings have been described  
131 in detail previously (*Smith and Kohn, 2008*). Briefly, anesthesia was induced with ketamine HCl (10 mg/kg) and  
132 animals were maintained during preparatory surgery with isoflurane (1.5-2.5% in 95% O<sub>2</sub>). Anesthesia during  
133 recordings was maintained with continuous administration of sufentanil citrate (6-18 µg/kg/hr, adjusted as  
134 needed for each animal). Vecuronium bromide (Norcuron, 0.1 mg/kg/hr) was used to suppress eye movements  
135 and ensure stable eye position during visual stimulation and recordings. Drugs were administered in normosol  
136 with dextrose (2.5%) to maintain physiological ion balance. Physiological signs (ECG, blood pressure, SpO<sub>2</sub>,  
137 end-tidal CO<sub>2</sub>, EEG, temperature, and urinary output and osmolarity) were continuously monitored to ensure  
138 adequate anesthesia and animal well-being. Temperature was maintained at 36-37 C°.

139 Recordings of neural activity were made from 100-electrode “Utah” arrays (Blackrock Microsystems)  
140 using methods reported previously (*Kelly et al., 2007; Smith & Kohn, 2008*). Each array was composed of a  
141 10x10 grid of 1 mm long silicon microelectrodes, spaced by 400  $\mu\text{m}$  (16  $\text{mm}^2$  recording area). Each  
142 microelectrode in the array typically had an impedance of 200-800 k $\Omega$  (measured with a 1 kHz sinusoidal  
143 current), and signals were amplified and bandpass filtered (250 Hz to 7.5 kHz) by a Blackrock Microsystems  
144 Cerebus system. The arrays were inserted 0.6 mm into cortex using a pneumatic insertion device (*Rousche &*  
145 *Normann 1992*).

146 Our full data set consisted of acute recordings from 7 microelectrode arrays across 3 amblyopic macaque  
147 monkeys and 1 control monkey. One of the amblyopic animals had 4 array implants; one had 2 array implants,  
148 and the third had 1 array implant. The control animal had a single implant. For animals with multiple implants in  
149 a single hemisphere, the array was removed and shifted to a different, non-overlapping region of cortex prior to  
150 reimplantation. Arrays were inserted within a 10 mm craniotomy made in the skull, centered 10 mm lateral to the  
151 midline and 10 mm posterior to the lunate sulcus. The resulting receptive fields lay within  $5^\circ$  of the fovea.

152 *Visual stimulation.* We presented stimuli on a gamma-corrected CRT monitor (Eizo T966), with spatial resolution  
153 1280 x 960 pixels, temporal resolution 120 Hz, and mean luminance 40  $\text{cd}/\text{m}^2$ . Viewing distance was 1.14 m or  
154 2.28 m. Stimuli were generated using an Apple Macintosh computer running Expo  
155 (<http://corevision.cns.nyu.edu>).

156 We used a binocular mirror system to align each eye’s fovea on separate locations on the display monitor,  
157 so that stimuli presented in the field of view of one eye did not encroach on the field of view of the other eye.  
158 This setup enabled us to show stimuli to the receptive fields for the right and left eye independently. We mapped  
159 the neurons’ spatial receptive fields by presenting small, drifting gratings (0.6 degrees; 250 ms duration) at a  
160 range of spatial positions in order to ensure accurate placement of visual stimuli within the recorded neurons’  
161 receptive fields. During experimental sessions, we presented full-contrast drifting sinusoidal gratings at 12  
162 orientations spaced equally ( $30^\circ$ ) in the field of view of either the right or the left eye on alternating trials. Each  
163 stimulus was 8–10 deg in diameter and was presented within a circular aperture surrounded by a gray field of  
164 mean luminance. Each stimulus orientation was repeated 100 times for each eye. Periods of stimulus  
165 presentation lasted 1.28 seconds and were separated by 1.5 s intervals during which we presented a  
166 homogeneous gray screen of mean luminance. In one of the amblyopic animals (4 separate array implants) and

167 the control animal, we presented the drifting sinusoidal gratings at 12 orientations and 3 contrast levels (100%,  
168 50%, 12%). In these cases, stimuli were presented for 1 second and each stimulus orientation was repeated 50  
169 times at each of three contrasts. The spatial frequency (1.3 c/deg) and drift rate (6.25 Hz) values for the grating  
170 stimuli were chosen to correspond to the typical preference of parafoveal V1 neurons (*DeValois et al., 1982*;  
171 *Foster et al., 1985*; *Smith et al., 2002*) and to be well within the spatial frequency range where we could  
172 behaviorally demonstrate contrast sensitivity in both eyes.

173 *Spike sorting and analysis criteria.* Our spike sorting procedures have been described in detail previously (Smith  
174 & Kohn, 2008). In brief, waveform segments exceeding a threshold (based on a multiple of the r.m.s. noise on  
175 each channel) were digitized at 30 kHz and stored for offline analysis. We first employed an automated algorithm  
176 to cluster similarly shaped waveforms (*Shoham et al., 2003*) and then manually refined the algorithm's output for  
177 each electrode. This manual process took into account the waveform shape, principal component analysis, and  
178 inter-spike interval distribution using custom spike sorting software written in Matlab  
179 (<https://github.com/smithlabvision/spikesort>). After offline sorting, we computed a signal to noise ratio metric for  
180 each candidate unit (*Kelly et al., 2007*) and discarded any candidate units with SNR below 2.75 as multi-unit  
181 recordings. We also eliminated neurons for which even the best grating stimulus evoked a response of less than  
182 1 spike/second. We considered the remaining candidate waveforms (240 units total across sessions) to be high-  
183 quality, well isolated single units and we included these units in all further analyses.

184 *Measures of correlation.* Here we provide a brief description of correlation analyses performed for this study. A  
185 detailed discussion can be found in two previous publications (*Kohn and Smith, 2005*; *Smith and Kohn, 2008*).  
186 The  $r_{sc}$ , also known as spike count correlation or noise correlation, captures the degree to which trial-to-trial  
187 fluctuations in responses are shared by two neurons. Quantifying the magnitude of the correlation in trial-to-trial  
188 response variability is achieved by computing the Pearson correlation coefficient of evoked spike counts of two  
189 cells to many presentations of an identical stimulus. For each session, we paired each neuron with all of the  
190 other simultaneously recorded neurons, but excluded any pairs of neurons from the same electrode. We then  
191 combined all the pairs from all of the recording sessions in the amblyopic animals, and separately, the control  
192 animal. This resulted in 4630 pairs across the 3 amblyopic animals and 155 pairs in one control animal. For  
193 each stimulus orientation, we normalized the response to a mean of zero and unit variance (Z-score), and  
194 calculated  $r_{sc}$  after combining responses to all stimuli. We removed trials on which the response of either neuron

195 was > 3 SDs different from its mean (*Zohary et al., 1994*) to avoid contamination by outlier responses. We also  
196 compared our measures of response correlation to the tuning similarity of the two neurons, which we calculated  
197 as the Pearson correlation between the mean response of each cell to each of the tested orientations (termed  
198  $r_{\text{signal}}$ ). For neurons with similar orientation tuning  $r_{\text{signal}}$  is closer to 1, while neurons with dissimilar tuning have  
199  $r_{\text{signal}}$  values approaching  $-1$ .

200 *Ocular dominance analysis:* For each unit, we first obtained the average firing rate response to each of the 12  
201 orientations of high contrast gratings, then subtracted the baseline firing rate measured during the interstimulus  
202 intervals. Next, we determined each unit's eye preference by comparing the maximum mean response elicited  
203 by visual stimulation of the fellow eye ( $R_f$ ) with the same unit's maximum response to visual stimulation of the  
204 amblyopic eye ( $R_a$ ). Specifically, we computed an ocular dominance index (ODI) defined as  $ODI = (R_f - R_a)/(R_f$   
205  $+ R_a)$ . The ODI values ranged from  $-1$  to  $1$ , with more negative values signifying a cell's preference for amblyopic  
206 eye stimulation, and more positive values indicating a preference for the fellow eye. For the pairwise analyses,  
207 we measured the difference between the ODI values of the cells constituting each pair, such that cells with a  
208 very similar eye preference had an ODI difference close to  $0$ , and cells preferring opposite eyes had an ODI  
209 difference close to  $2$ .

210 *Statistical significance tests:* All indications of variation in the graphs and text are standard errors of the mean  
211 (s.e.m.). The statistical significance of all results was evaluated with paired t-tests, unless otherwise noted.

212 We used a bootstrapping method for statistical testing of the relationships between  $r_{\text{sc}}$  and  $r_{\text{signal}}$ . Specifically, for  
213 1000 iterations, we sampled with replacement from a pool of matched  $r_{\text{sc}}$  and  $r_{\text{signal}}$  values computed for each  
214 pair of neurons, separately for each eye condition. Using the "polyfit" function in Matlab, we then computed the  
215 slope of a line fit through the scatter of  $r_{\text{sc}}$  values plotted against the corresponding  $r_{\text{signal}}$  values for the neuronal  
216 pairs used on each sampling iteration. Thus, for each eye stimulation condition, we collected 1000 estimates of  
217 the slope of the linear relationship between  $r_{\text{sc}}$  and  $r_{\text{signal}}$ . We then looked at confidence interval bounds to test  
218 for a statistically significant difference between the bootstrapped distributions of slope values computed for  
219 amblyopic vs. fellow eye stimulation. We also performed the same bootstrapping procedure to assess whether  
220 the relationship between  $r_{\text{sc}}$  and eye preference was significantly different between fellow and amblyopic eye  
221 conditions. We used non-smoothed data for this statistical analysis.



222 We also used bootstrapping for statistical testing of the interocular difference in delta  $r_{sc}$ . Briefly, we calculated  
223  $\Delta r_{sc}$  in our data set by subtracting the high contrast  $r_{sc}$  value of each neuronal pair from the low contrast  $r_{sc}$  value  
224 attained for the same pair of neurons. We then performed 1000 iterations of randomly sampling with replacement  
225 from the pool of pairs of neurons (1381 pairs total). Each pair of neurons was associated with a high contrast  
226 and low contrast  $r_{sc}$  value that we could use to compute  $\Delta r_{sc}$ . For each eye condition, on each iteration, we  
227 computed the average of the sample of  $\Delta r_{sc}$  values. In the end we collected a distribution of 1000 average  $\Delta r_{sc}$   
228 values for each eye condition. We compared these distributions of  $\Delta r_{sc}$  values using confidence interval bounds.

229 *Decoding stimulus orientation.* Within 4 separate recording sessions, we randomly subdivided the spiking data  
230 in our two eye conditions such that a subset of the trials was used to train the classifier and the held-out trials  
231 were used to assess classification performance. We did 3 rounds of cross-validation such that 3 different random  
232 subsets of trials were used for training the classifier. For 3 of the recording sessions, we show the average  
233 performance of 20 classifiers each trained and tested on the responses of 30 randomly selected V1 neurons in  
234 each session. In the fourth session, we only recorded from 30 neurons in total, and thus we assessed  
235 performance of just one classifier for this session. The remaining three of the total seven sessions had  
236 comparatively few simultaneously recorded cells (~10) and thus were not included in this decoding analysis.

237 As we had a total of 12 stimulus orientations, for each testing trial, a trained multi-class classifier was tasked  
238 with deciding which one of 12 orientations (classes) was most fitting given the V1 population activity on that trial.  
239 We used the Error-Correcting Output Coding method (ECOC) which decomposed our multi-class classification  
240 problem into many binary classification tasks solved by binary SVM classifiers. In the ECOC framework, the final  
241 decision about the class label for a piece of data is achieved by considering the output/"vote" of each subservient  
242 binary classifier.

## 243 **Results**

244 The overall goal of our study was to examine whether neuronal interactions are altered within primary visual  
245 cortex of strabismic amblyopes. To this end, we recorded from populations of V1 neurons using 100-electrode  
246 "Utah" arrays while a visual stimulus was separately presented to the amblyopic or the fellow, non-amblyopic  
247 eye of anesthetized macaque monkeys. We then evaluated the strength and pattern of correlation in the recorded  
248 populations in order to determine if functional interactions among neurons differed during visual stimulation of  
249 each eye.

## 250 Behavioral deficits in amblyopic monkeys

251 Prior to the neural recordings, we characterized the behavioral extent of the amblyopic visual deficits by  
252 constructing spatial contrast sensitivity functions for each eye in each animal. The fitted curves were used to  
253 estimate the optimal spatial frequency and peak contrast sensitivity. For the three strabismic amblyopes, reduced  
254 contrast sensitivity and spatial resolution in the amblyopic eye was evident from the reduced peak and spatial  
255 extent of the fitted curve (Fig 1). The control animal was tested binocularly and confirmed to be visually normal  
256 (Fig 1). Based on these behavioral assessments, we concluded that all three of our experimental animals had  
257 severe strabismic amblyopia.

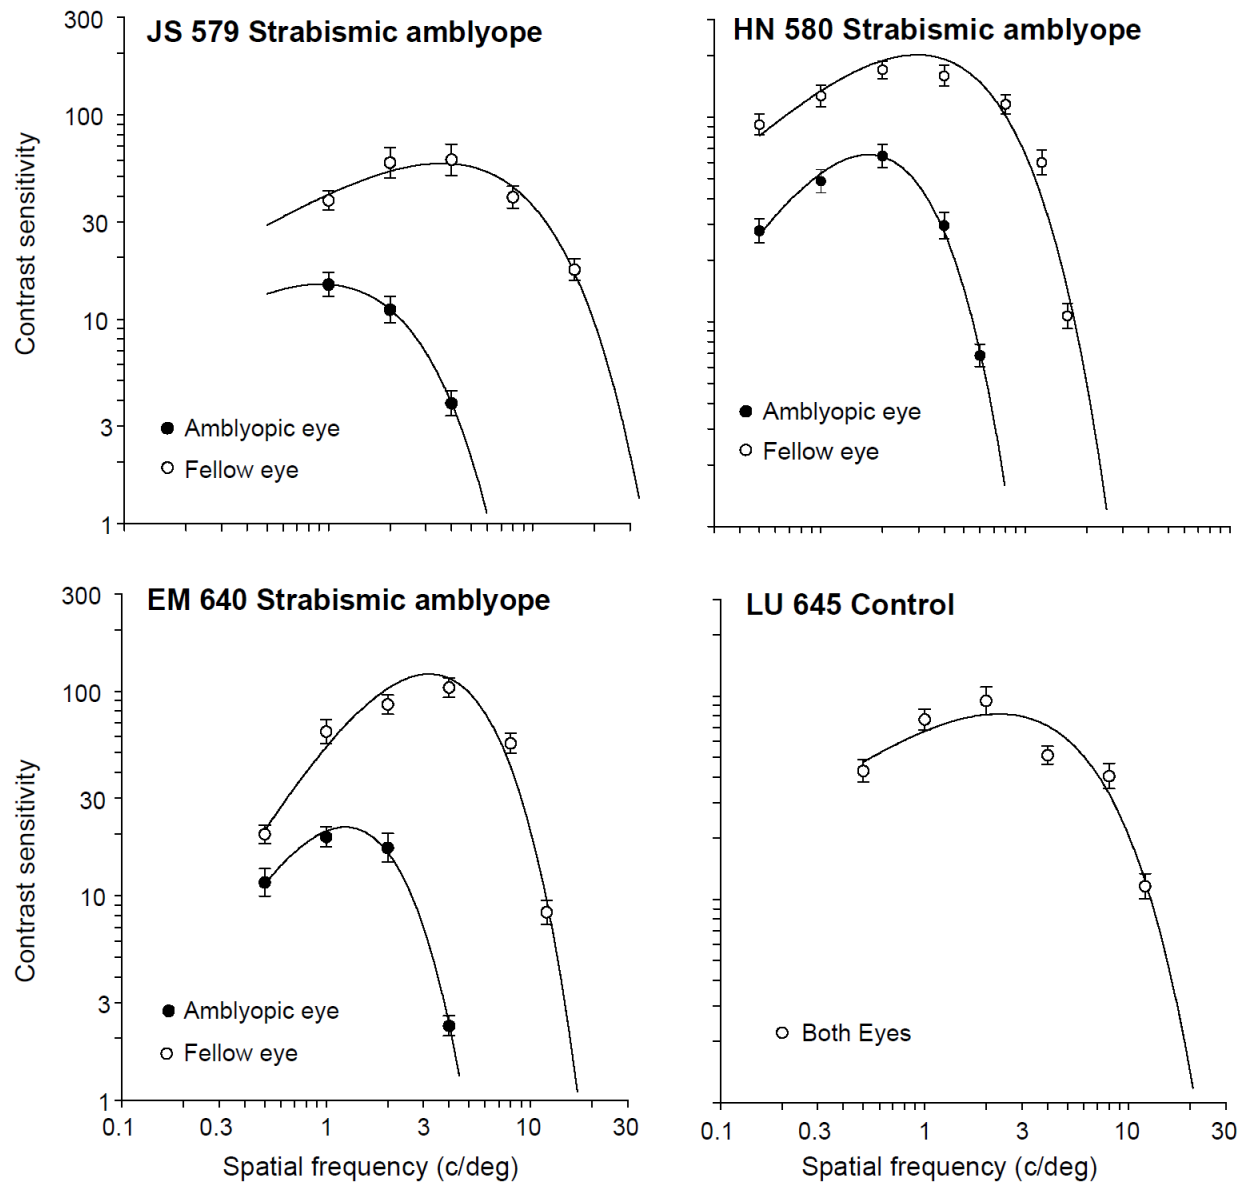

258

259 **Figure 1.** Spatial contrast sensitivity functions, plotted separately for the amblyopic eye (filled symbols) and fellow eye (unoperated,  
260 normal eye; open symbols). The four panels show plots for 3 strabismic amblyopes and 1 control, visually normal animal. Behavioral  
261 sensitivity loss in the amblyopic eye was observed for all 3 amblyopes: the peak contrast sensitivity was both decreased and shifted to  
262 lower spatial frequencies for the amblyopic eyes compared to the fellow eyes.

263 ***Amblyopia affects individual neuronal responsivity***

264 We first studied the changes in single neuron responses in amblyopic primary visual cortex. We recorded  
265 from “Utah” arrays while a drifting sinusoidal grating was presented to either the fellow or amblyopic eye of an  
266 anesthetized monkey. We presented full-contrast gratings of 12 different orientations to either the amblyopic or  
267 fellow eye of three monkeys. For comparison, we also analyzed neural responses to the full-contrast stimuli  
268 shown to the right or left eye of the control animal.

269 We found that most V1 neuronal firing rates were substantially lower during amblyopic eye stimulation  
270 compared to fellow eye stimulation (Fig 2A-B). For the example in Figure 2A, the peak response was about 1.5  
271 times greater for stimulation of the fellow eye than for the amblyopic eye. Over the whole population of recorded  
272 neurons, the mean maximum response to stimuli presented to the fellow eye was 15.08 sp/s, compared to 9.56  
273 sp/s for the same stimuli presented to the amblyopic eye ( $p < 0.0001$ , Fig 2B). In the control animal, considering  
274 all the recorded neurons, there was no statistically significant difference in maximum evoked firing rates for left  
275 versus right eye stimulation (Fig 2C, 9.61 vs. 9.65 sp/s,  $p = 0.92$ ).

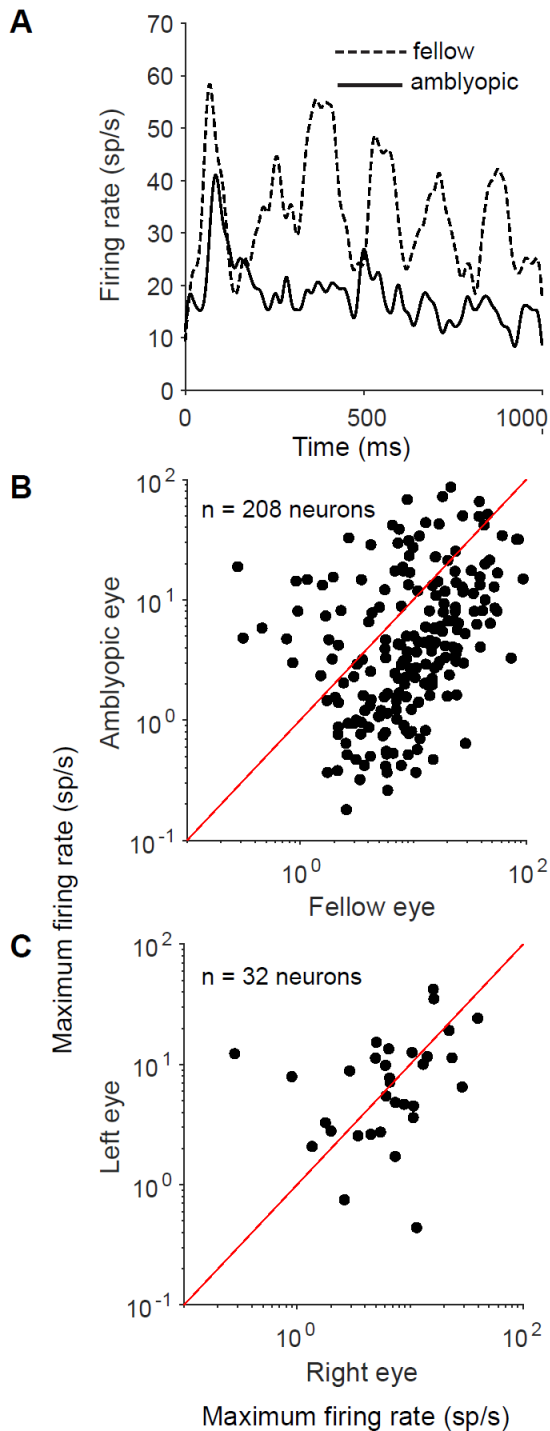

276

277

278

279

280

281

282

283

284

285

286

287

**Figure 2.** Comparison of neuronal responses to normal and amblyopic eye stimulation. (A) An example neuron's firing rate responses to separate stimulation of the fellow (dashed) and amblyopic (solid) eyes with an identical sinusoidal grating, drifting in the neuron's preferred orientation. Upon amblyopic eye stimulation, the neuron's firing rate was diminished. (B) Each point in the scatter diagram represents the maximum firing rate of each recorded neuron across 12 tested orientations of drifting gratings. The maximum firing rates in response to stimulation of the fellow eye are plotted against the maximum firing rates evoked by amblyopic eye stimulation. The majority of recorded neurons showed decreased responsivity to amblyopic eye stimulation as compared to fellow eye stimulation. Combined across animals, a total of 208 neurons were recorded from V1 of amblyopic animals. (C) Same as in (B), except data for the control animal are shown. A total of 32 neurons were recorded in the control, visually normal animal. There was no observed difference in the maximum firing rates elicited by stimulation of normal right and left eyes.

## 288 ***Amblyopia alters coordinated population activity***

289 Numerous recent studies have been devoted to understanding how stimulus information is embedded in  
290 the population code. In particular, the pattern of correlated variability and its dependence on the stimulus-  
291 response structure have been shown in theoretical studies to have potential importance for the information in  
292 the population code (*Averbeck et al., 2006; Kohn et al., 2016*). We reasoned that amblyopia could alter the  
293 activity pattern and level of interaction in networks of V1 neurons, and might thereby influence information  
294 encoding and behavioral performance.

295 We measured the correlated variability of neural responses to quantify the interactions in pairs of  
296 simultaneously recorded V1 neurons. It is well established that neurons respond with variable strength to  
297 repeated presentations of identical stimuli (*Tolhurst et al. 1983; Shadlen & Newsome 1998*). A small portion of  
298 this variability, or noise, is shared between neighboring neurons in cortex. The degree to which trial-to-trial  
299 fluctuations in responses are shared by two neurons can be quantified by computing the Pearson correlation of  
300 spike count responses to many presentations of the same stimulus (termed spike count correlation,  $r_{sc}$ , or noise  
301 correlation). In Figure 3A, the scatterplot depicts the spike count responses of two example recorded V1 neurons  
302 to an identical stimulus presented to the fellow eye on many trials. The depicted pair of neurons has a positive  
303  $r_{sc}$  of 0.31, indicating that responses of these two neurons tend to fluctuate up and down together across trials.  
304 We measured correlations over the entire stimulus window (1.28 s), for all pairs of neurons recorded either during  
305 amblyopic or fellow eye stimulation (*see Materials and Methods*).

306 Correlations for pairs of neurons were significantly larger when a stimulus was presented to the amblyopic  
307 eye compared to the fellow eye (Fig 3B; mean  $r_{sc}$  0.21 vs 0.16; paired t-test,  $p < 0.00001$ ). Because we  
308 randomized the visual stimulus between the eyes across trials, we were able to make this comparison directly  
309 in the same neurons. Thus, the observed difference in  $r_{sc}$  between amblyopic and fellow eye stimulation provides  
310 evidence for altered functional interactions in the same population of neurons. There was no statistically  
311 significant inter-ocular difference in  $r_{sc}$  in the control animal (Fig 3C, paired t-test,  $p = 0.76$ ).

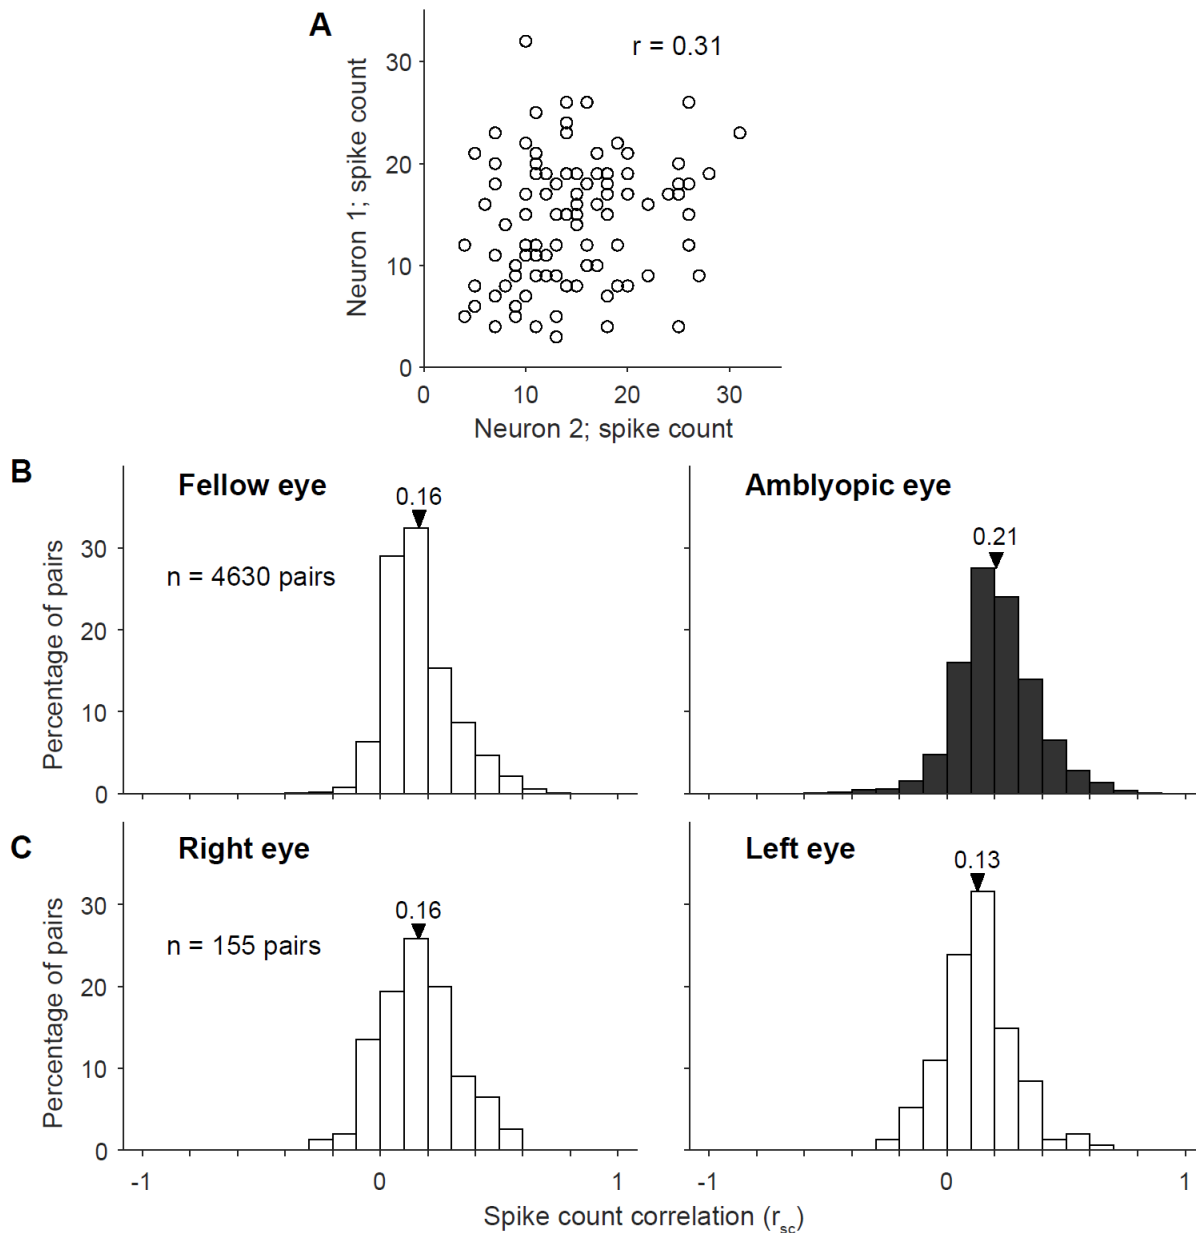

312

313 **Figure 3.** Effect of amblyopia on correlated variability of responses in a population of V1 neurons. (A) The scatter plot shows the aggregate  
 314 single trial responses of an example pair of recorded V1 neurons to 100 repeat presentations of a single identical stimulus. Both of the  
 315 neurons' responses were 'noisy', varying from trial to trial. Spike count correlation ( $r_{sc}$ ), also known as noise correlation, is computed as  
 316 the Pearson's correlation coefficient ( $r$ ) of the responses of two cells to repeated presentations of an identical stimulus. (B) Spike count  
 317 correlation was significantly increased for pairs of neurons responding to amblyopic eye stimulation, compared to fellow eye stimulation  
 318 ( $p < 0.00001$ ). Shown are the distributions of  $r_{sc}$  computed across 4630 pairs of neurons. Spike count correlation was computed separately  
 319 for neuronal responses evoked by visual stimulation of the amblyopic (filled) and fellow (white) eyes. For each neuronal pair, we calculated  
 320 the average  $r_{sc}$  measured across all stimulus orientations. (C) Same as in (B), except  $r_{sc}$  was computed for pairs of neurons in the control,  
 321 visually normal animal when either the right or the left eye were stimulated. There was no inter-ocular difference in spike count correlation  
 322 in the control animal ( $p = 0.76$ ).

323

### **Stimulus-dependent correlation structure is modified in amblyopic V1**

324

325

326

327

Several experimental and theoretical studies suggest that the structure of correlations – the dependence  
 of correlations on the functional properties and physical location of neurons – can have a strong influence on the  
 information encoded by the population (see *Averbeck et al., 2006* and *Kohn et al., 2016* for reviews). Previous  
 work in normal macaque V1 and V4 has shown that correlations are highest for pairs of neurons that are near

each other and that have similar orientation tuning preferences (Kohn & Smith, 2005; Smith & Kohn, 2008; Smith & Sommer, 2013). Here, we investigated whether the correlation structure observed in visual cortex of normal animals is maintained in the cortex of amblyopes. To do this, we first examined if  $r_{sc}$  measurements differed depending on the distance between the neurons in each pair. We found that  $r_{sc}$  was largest for pairs of neurons near each other, compared to pairs of neurons farther apart, for both fellow and amblyopic eye stimulation (Fig 4A & C). Thus, for cortical processing of visual information received through the amblyopic eye, correlations were increased for all pairs of neurons, regardless of the distance between them.

We next investigated whether the relationship between tuning similarity and the magnitude of correlations was altered in the cortex of amblyopes. We used sinusoidal gratings of 12 different orientations to engage neurons with varied orientation preferences, which enabled us to assess the tuning similarity of each pair of neurons. Tuning similarity was quantified by calculating  $r_{signal}$ , the Pearson correlation of the mean responses of two neurons to each of 12 stimulus orientations. To test how functional interactions varied among neurons with different tuning preferences, we calculated  $r_{sc}$  as a function of  $r_{signal}$ . As in previous studies, we found that  $r_{sc}$  was highest for neurons with similar tuning (large, positive  $r_{signal}$ ), and lowest for neurons with opposite tuning preferences (negative  $r_{signal}$ ), for both fellow and amblyopic eye stimulation (Fig 4B & C). However, for the amblyopic eye, the relationship between  $r_{sc}$  and  $r_{signal}$  was significantly stronger compared to the fellow eye ( $p < 0.05$ ; see *Methods* for details of bootstrapping and statistical testing), such that pairs of similarly tuned neurons exhibited the largest difference in  $r_{sc}$  between the amblyopic and fellow eye stimulation conditions (Fig 4B&C). That is, pairs of similarly tuned neurons show the largest increase in  $r_{sc}$  between fellow and amblyopic eye stimulation. So, both raw correlation for stimulation of each eye as well as the difference in correlation between activity evoked by stimulation of the two eyes depend on tuning similarity of a pair of neurons. In the control animal, we found that  $r_{sc}$  was highest for neurons with similar tuning and lowest for neurons with opposite tuning preferences, for both left and right eye stimulation, as previously reported in normal animals. Overall, our results suggest that amblyopia affects not only the overall level of correlation, but also the extent to which neurons interact with their neighbors of both similar and dissimilar stimulus preferences.

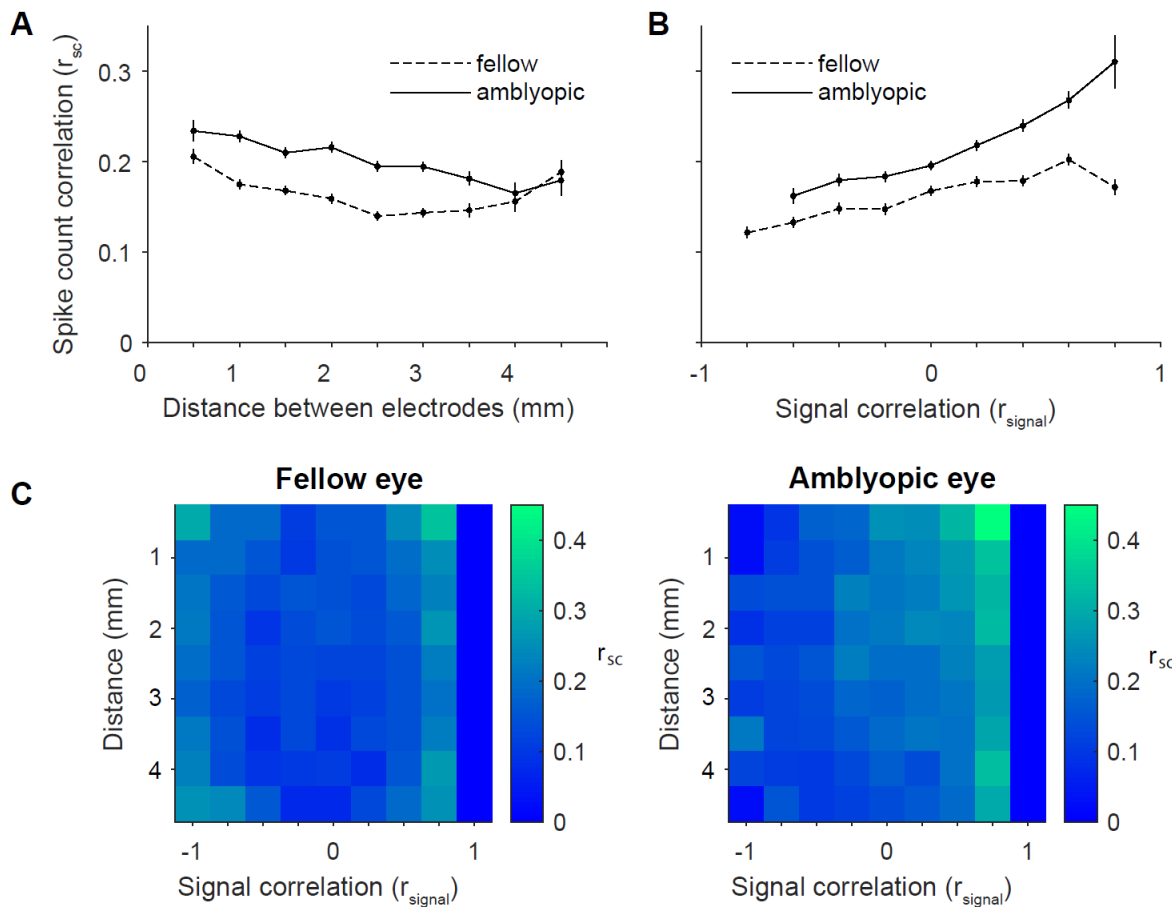

**Figure 4.** Dependence of  $r_{sc}$  on distance and tuning similarity in amblyopic V1. (A) Stimuli presented to the amblyopic eye (solid line) resulted in higher spike count correlation over all possible distances between recorded neurons, as compared to fellow eye stimulation (dashed line). Mean spike count correlation is plotted as a function of the distance between the array electrodes that contain the neurons in each assessed pair. The distance bins start at 0 mm and extend to 4.5 mm in 0.5 mm increments. The average of the  $r_{sc}$  values for neuronal pairs included in each bin is plotted at the end value for each bin. Error bars represent s.e.m. (B) For fellow and amblyopic eye stimulation, mean spike count correlation is plotted as a function of signal correlation, which can be thought of as similarity in orientation tuning of the two neurons. The  $r_{signal}$  bins start at -1.0 and extend to 1.0 in 0.2 increments. The average of the  $r_{sc}$  values for neuronal pairs included in each bin is plotted at the start value for each bin. As has been reported previously, spike count correlation increased with signal correlation. Furthermore, for the amblyopic eye, the relationship between  $r_{sc}$  and  $r_{signal}$  was significantly stronger compared to the fellow eye ( $p < 0.05$ ), indicating that similarly tuned neurons exhibit the largest increase in shared trial-to-trial variability. Error bars represent s.e.m. (C) Summary color maps illustrate the relationships between distance, spike count correlation and signal correlation for fellow vs. amblyopic eye stimulation. The scale of the colors is indicated by the bar on the right.  $r_{signal}$  bins start at -1 and extend to 1 in 0.25 increments.

### **Increased correlations predominate among amblyopic V1 neurons that preferentially respond to fellow eye**

In amblyopes, binocular organization in V1 is disrupted, such that the ocular dominance distribution becomes U-shaped with a significant reduction in binocularly activated cells (Baker et al. 1974; Crawford & von Noorden, 1979; Fenstemaker et al. 1997; Smith et al., 1997; Kiorpes et al., 1998). Additionally, several studies report a decrease in the number of cortical neurons that preferentially respond to visual stimulation through the amblyopic over the fellow eye (e.g. Adams et al., 2013; Hubel & Wiesel, 1965; Kiorpes et al., 1998; Crawford &



375 *Harwerth 2004; Shooner et al., 2015; (in cat) Schröder et al., 2002*). Specific changes in the circuitry underlying  
376 the eye preference and binocular responsivity of V1 neurons could be reflected in an altered pattern of pairwise  
377 interactions in the population. Therefore, we next examined whether our observed changes in spike count  
378 correlation were associated with eye preference changes of individual neurons in amblyopic V1.

379 For each cell, we first computed an ocular dominance index (ODI) as a measure of the cell's eye  
380 preference. ODI distributions in each amblyopic animal ranged between the values of -1 and 1, with more  
381 negative and positive values indicating higher responsivity to visual stimuli viewed through the amblyopic or  
382 fellow eye, respectively. Figure 5A shows a distribution of ODI values for 208 neurons recorded from the 3  
383 amblyopic animals. We observed an ocular dominance bias toward positive values, indicating that the majority  
384 of cells fired more strongly in response to visual stimulation of the fellow eye than the amblyopic eye (141 neurons  
385 with ODI value  $> 0.2$  and 36 neurons with ODI value  $< -0.2$ ). There were relatively few binocularly activated V1  
386 neurons in our amblyopic animals (31 neurons with ODI values within  $\pm 0.2$  of 0).

387 We next investigated whether the magnitude of spiking correlations was dependent on the eye from which  
388 each neuron received its dominant input. In this analysis, we measured correlations in pairs of neurons as a  
389 function of the difference in eye preference between the cells in each pair, termed ODI difference. Differences  
390 in ODI ranged from 0 to 2, where cells that preferred the same eye had an ODI difference of 0, while cells that  
391 preferred opposite eyes had an ODI difference of 2. Because of the ocular dominance bias in our neuronal  
392 population, the majority of neuronal pairs with an ODI difference close to 0 preferred the fellow eye. We first  
393 analyzed the magnitude of correlation as a function of the ODI difference, and found that there was a negative  
394 relationship in both the fellow (Fig 5B) and amblyopic (Fig 5C) eye. This effect could be due simply to the lower  
395 mean firing rates among pairs of neurons that preferred quite dissimilar stimuli. For the fellow eye, this was  
396 indeed the case – the correlation tracked the geometric mean firing rate of the pairs of neurons. However, for  
397 the amblyopic eye there was a particularly high level of correlation among neurons that received input from the  
398 same eye (ODI difference  $< 0.8$ ) that could not be explained by the firing rates. Accordingly, we found that the  
399 relationship between eye preference similarity and the magnitude of correlations in pairs of neurons was  
400 significantly different between the two eyes (stronger for the amblyopic eye,  $p < 0.05$ ; see *Methods* for details on  
401 bootstrapping and statistical testing). These results are consistent with the idea that the circuit plasticity that

402 underlies eye preference changes in single neurons in amblyopic V1 also leads to changes in the pattern of  
403 interactions among monocular and binocular neurons within and across ocular dominance columns.

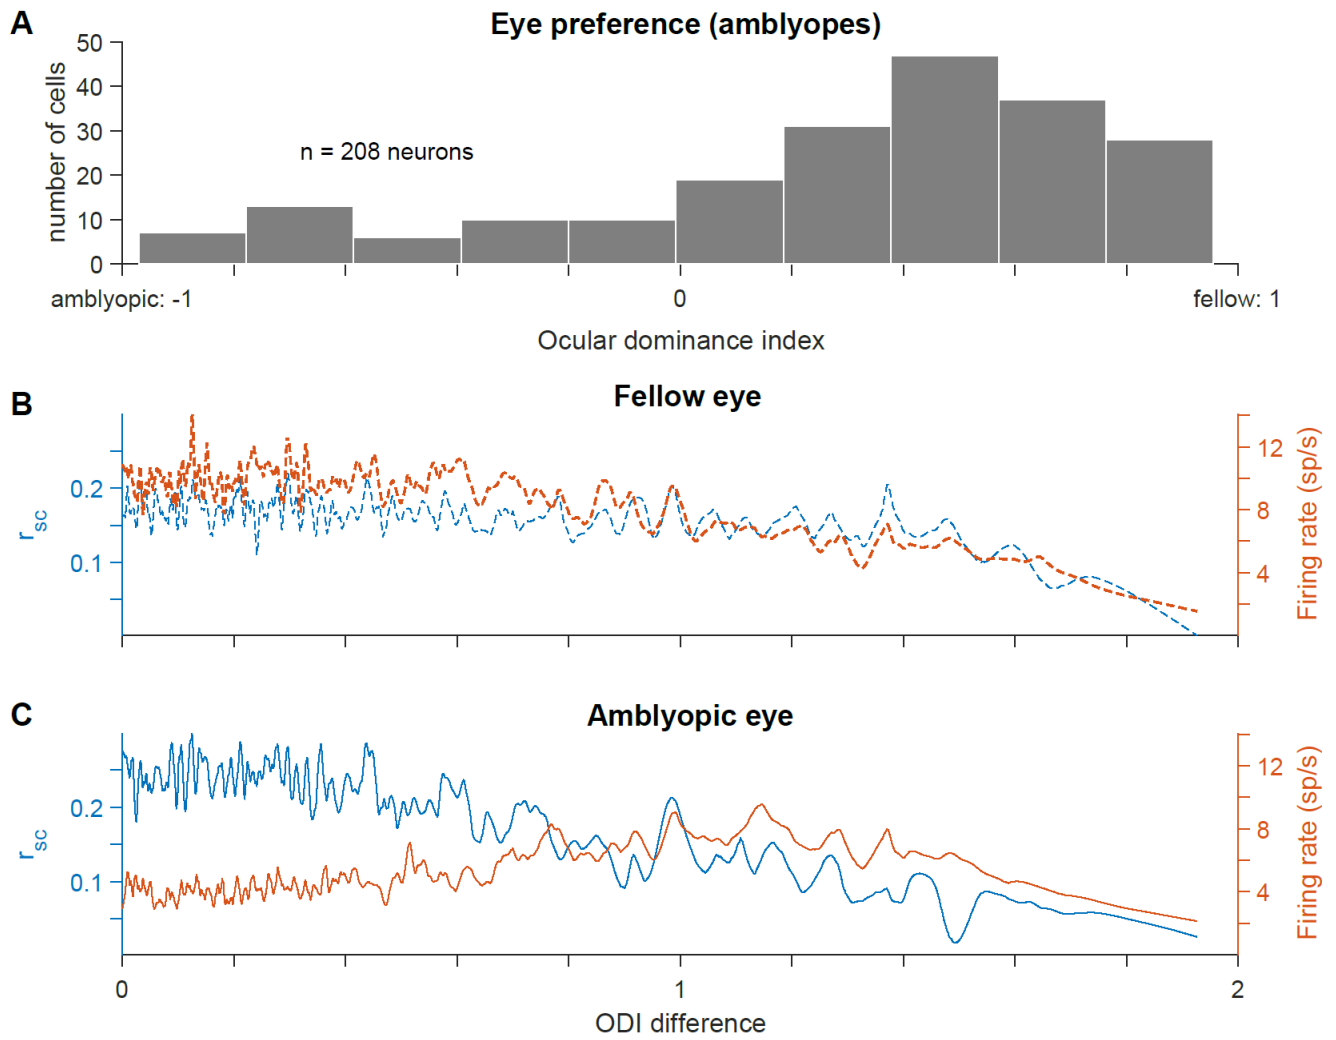

404

405 **Figure 5.** Relationship between ocular dominance changes and increased correlations in amblyopic V1. (A) A histogram showing the  
406 ocular dominance index (ODI) values for all 208 neurons recorded across the 3 amblyopic animals. Neurons with ODI values closer to -  
407 1 preferentially responded to visual input through the amblyopic eye, while neurons with ODI values closer to 1 had higher responsivity  
408 to fellow eye visual stimulation. The ODI values were unevenly distributed, and biased toward the fellow eye (ODI < -0.2: 36 neurons; -  
409 0.2 < ODI < 0.2: 31 neurons; ODI > 0.2: 141 neurons). (B) For fellow eye visual stimulation, spike count correlation values (left y-axis) and  
410 firing rates (right y-axis) are plotted as a function of the difference in ODI values of the neurons in each pair. An ODI difference closer to  
411 0 indicates that the neurons composing the pair have the same ocular preference. The traces shown were produced by smoothing over  
412 the data points with a sliding window (size of window = 15 data points). (C) same as in (B), but considering V1 responses to visual  
413 stimulation through the amblyopic eye. Neurons with similar ODIs had higher correlations during amblyopic eye stimulation, compared to  
414 the level of correlations in the same neuron pairs during fellow eye stimulation ( $p < 0.05$ ).

#### 415 ***Decoding stimulus orientation from amblyopic V1 population activity***

416 The modifications in pattern and strength of functional interactions that we observed in amblyopic V1  
417 could degrade the encoding of stimuli presented to the amblyopic eye. Therefore, we compared how well the  
418 recorded network of V1 neurons represented stimulus information when high contrast visual input was delivered

419 through the amblyopic versus the fellow eye. We used a statistical classification method to decode stimulus  
420 orientation from the activity of simultaneously recorded V1 neurons (see *Methods* for details). As we had a total  
421 of 12 stimulus orientations, for each testing trial, a trained multi-class classifier was tasked with deciding which  
422 one of 12 possible classes was most consistent with the V1 population activity on that trial. Using this  
423 classification analysis, we explored whether visual stimulus information was harder to read out from V1  
424 population activity when the amblyopic eye provided the input.

425 We found that classification accuracy was substantially decreased when a classifier was trained and  
426 tested on neuronal responses during amblyopic eye stimulation compared to training and testing on V1  
427 responses to fellow eye stimulation. Figure 6 shows decoding accuracy for fellow versus amblyopic eye  
428 stimulation trials for four different recording sessions across 3 animals. While decoding performance remained  
429 above chance (8.33%) for both of the eyes in all four examined sessions, accuracy was consistently reduced  
430 when decoding from neural responses to amblyopic eye visual input.

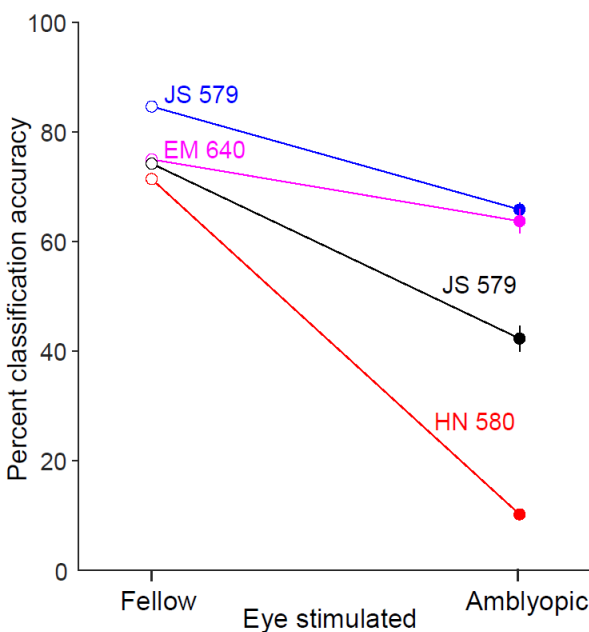

431

432 **Figure 6.** Decoding grating orientation from fellow or amblyopic eye stimulation. When trained and tested on neuronal responses during  
433 amblyopic eye stimulation, the decoding accuracy was decreased compared to when a decoder is trained and tested on responses to  
434 fellow eye stimulation. The four colors correspond to decoding results from neuronal responses on 4 different array implants across 3  
435 animals.

#### 436 ***Effect of stimulus contrast on correlated variability in amblyopic V1***

437 Despite previous work, our understanding of the neural basis for diminished contrast sensitivity in  
438 amblyopes remains incomplete. It is possible that in amblyopia, a deficit in global network responsivity to contrast  
439 is more pronounced than individual neuron response deficits. Importantly, studies in visually normal animals

440 have shown that stimulus contrast can affect the level of interactions in a neuronal population. For instance,  
441 correlations in pairs of V1 neurons depend on stimulus contrast, such that  $r_{sc}$  is significantly larger for low contrast  
442 stimuli than high contrast stimuli (*Kohn & Smith, 2005*). This suggests that spontaneous cortical activity has a  
443 considerable amount of inherent correlated variability which can be reduced by strong stimulus drive (also see  
444 *Churchland et al. 2010*). Developmental abnormalities in the visual cortex of amblyopes could affect how  
445 networks of cortical neurons interpret the strength of stimulus drive provided by high vs. low contrast stimuli.  
446 Based on these observations in normal animals, we wondered how the amount of stimulus drive to the amblyopic  
447 eye affects the strength of correlated variability in V1?

448 We presented full (100%), medium (50%) and low (12%) contrast gratings of 12 different orientations,  
449 separately to the amblyopic or fellow eye of one of the amblyopic monkeys. We then measured the correlation  
450 in response variability of 1381 neuronal pairs in the recorded neuronal population for each stimulus contrast  
451 presented to each of the two eyes. Because  $r_{sc}$  values for neuronal pairs are known to depend on the firing rates  
452 of constituent neurons (see *Cohen & Kohn 2011*), for this analysis, we binned the computed  $r_{sc}$  values by  
453 geometric mean firing rate of neuronal pairs. This method allowed us to study the effect of stimulus contrast on  
454 correlated variability in amblyopic V1 while accounting for the wide range of responsivity observed across the  
455 recorded individual neurons (Fig 2B).

456 In agreement with the results of *Kohn & Smith (2005)*, when we analyzed the V1 population response on  
457 trials with fellow eye stimulation, lowering stimulus contrast significantly increased mean  $r_{sc}$  for all neural pairs  
458 regardless of their geometric mean firing rate (Fig 7A). Interestingly, for stimuli presented to the amblyopic eye,  
459  $r_{sc}$  was relatively insensitive to the level of contrast (Fig 7B). That is, a full contrast stimulus viewed by the  
460 amblyopic eye did not substantially reduce the amount of correlated variability in most V1 neurons (except those  
461 with very high firing rates) compared to a lower contrast stimulus. This is apparent when viewing a contrast  
462 response function for correlation (Fig 8), where the relatively flat lines in low-firing rate pairs of neurons for  
463 amblyopic eye stimulation indicate a lack of contrast sensitivity of correlation.

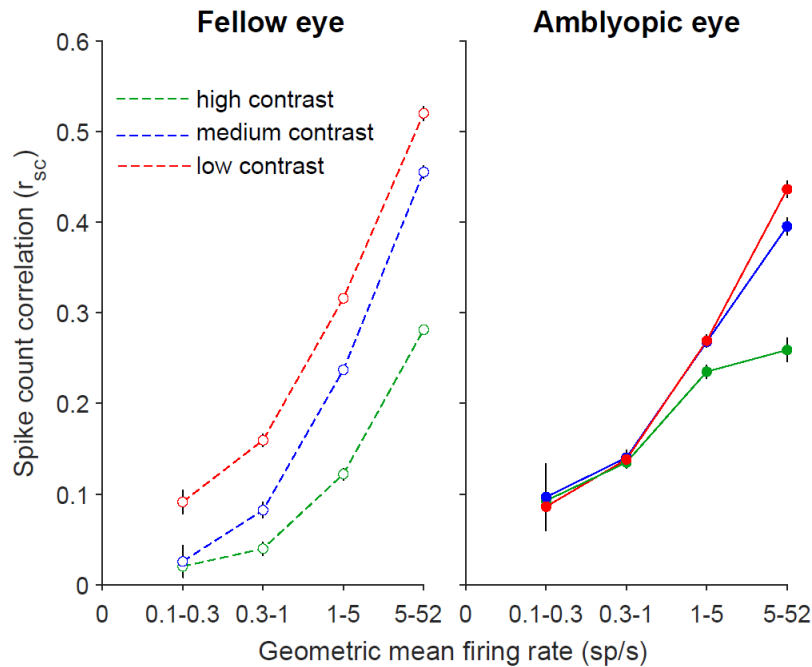

464

465 **Figure 7.** The average of the  $r_{sc}$  values for neuronal pairs in each geometric mean firing rate bin is plotted, for grating stimuli of high  
466 (green, 100%), medium (blue, 50%), and low (red, 12%) contrasts. Error bars represent s.e.m. For the fellow eye, lowering stimulus  
467 contrast significantly increased mean  $r_{sc}$  at all firing rates, while with amblyopic eye stimulation,  $r_{sc}$  was relatively unaffected by stimulus  
468 contrast. Computing the difference in  $r_{sc}$  between high and low contrast ( $\Delta r_{sc}$ ) for all 1381 neuron pairs revealed a significant inter-ocular  
469 disparity in  $\Delta r_{sc}$  in the amblyopic animal ( $p < 0.05$ ; based on confidence intervals of bootstrapped, mean  $\Delta r_{sc}$  distributions).

470

471 We next quantified the differential effect of stimulus contrast on the amount of correlated variability for  
472 the fellow versus the amblyopic eye. We computed the difference in  $r_{sc}$  between high and low contrast ( $\Delta r_{sc}$ ) for  
473 all neuron pairs separately for each eye condition. Since  $\Delta r_{sc}$  is computed by subtracting high contrast  $r_{sc}$  values  
474 from low contrast  $r_{sc}$  values, the closer  $\Delta r_{sc}$  is to 0, the more similar are the  $r_{sc}$  values computed during high and  
475 low contrast stimulation. This metric revealed that indeed, the  $\Delta r_{sc}$  distribution for amblyopic eye stimulation was  
476 shifted closer to 0, and was significantly different from the  $\Delta r_{sc}$  distribution computed for fellow eye stimulation  
477 (amblyopic mean = -0.1017, fellow mean = -0.1523;  $p < 0.05$ ; based on confidence intervals of bootstrapped,  
478 mean  $\Delta r_{sc}$  distributions). Furthermore, we also found a significant difference in the strength of this interocular  
479 disparity between the amblyopes and the control animal ( $p < 0.0001$ ). Thus, for stimulus processing in the  
480 amblyopic eye, neurons have not only impaired contrast sensitivity measured one cell at a time (*Movshon et al.,*  
481 *1987; Kiorpes et al., 1998*), but also maintain high levels of correlated variability even in the presence of strong  
stimulus input.

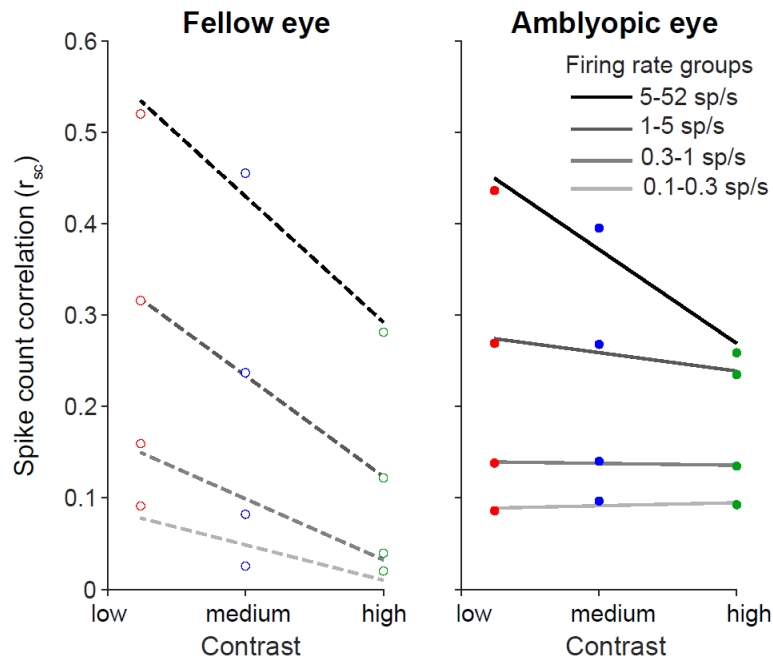

482

483 **Figure 8.** Dependence of spike count correlation on stimulus contrast. Amblyopic eye stimulation resulted in similar  $r_{sc}$  across three  
484 stimulus contrasts (100%, 50% and 12%).  $r_{sc}$  values are binned according to the mean firing rate for each neuronal pair, and the average  
485  $r_{sc}$  value per firing rate bin is plotted as a function of contrast.

## 486 Discussion

487 Our goal in this study was to gain insight into the neural basis of amblyopia by exposing abnormalities  
488 beyond those already known to affect individual neuronal responses. We recorded simultaneously from tens of  
489 neurons in primary visual cortex of monkeys with strabismic amblyopia, which allowed us to measure the  
490 functional interactions between pairs of neurons during visual stimulation of the fellow, non-amblyopic versus  
491 the amblyopic eye of each animal. Our primary finding was that the structure of correlated trial-to-trial response  
492 variability among V1 neurons is altered in amblyopic compared to fellow eye stimulation. Specifically, stimulation  
493 of the amblyopic eye resulted in larger levels of correlation that were restricted to neurons with similar orientation  
494 tuning and similar ocular dominance preference, and these correlations were relatively insensitive to stimulus  
495 drive. To examine the consequence of these changes in amblyopic cortex on stimulus representation in networks  
496 of V1 neurons, we decoded grating orientation from simultaneously recorded populations of neurons, and found  
497 that the accuracy of decoding stimulus orientation for amblyopic eye stimulation was reduced compared to  
498 decoding the same stimuli from neural activity in response to fellow eye stimulation. Taken together, these results  
499 constitute profound shifts in the functional response properties and interactions among neurons in amblyopic  
500 cortex that manifest when a stimulus is presented to the amblyopic eye.

## 501 **Altered circuitry in V1 of amblyopes**

502 What do our observed differences in  $r_{sc}$  between the two eyes suggest about circuits of V1 neurons that  
503 process visual information received from amblyopic eye? To answer this question, it is first necessary to consider  
504 the physiological sources of correlated variability (*for review see Doiron et al., 2016*). Correlations in pairs of  
505 neurons are generally thought to arise from common sensory afferent projections to two neurons (*Shadlen &*  
506 *Newsome, 1998*). More recent theoretical and experimental work suggests that correlations can also arise from  
507 feedback (top down) signals (*Cumming & Nienborg 2016*), feedforward processing of stimuli (*Kanitscheider,*  
508 *Coen-Cagli & Pouget, 2015*), recurrent connectivity in local circuits (*Doiron et al., 2016*), or sources of noise at  
509 the synapse, such as vesicle release dynamics (*Doiron et al., 2016*). Thus, changes in correlated variability can  
510 reflect reorganization in the underlying circuitry and accordingly, correlation analysis has previously proven  
511 useful for assessing changes in functional connectivity (*Greschner et al., 2011; Reid & Alonso, 1995; Cohen &*  
512 *Newsome, 2008*).

513 In our study of amblyopic V1, we found that during amblyopic eye stimulation, there was heightened co-  
514 fluctuation in V1 neuronal responses, and that the amount of correlated variability in the recorded population  
515 remains unchanged across low, medium and high stimulus drive to the amblyopic eye. Collectively, our results  
516 suggest that in amblyopic visual systems, networks of V1 neurons have altered connectivity and may function  
517 abnormally when processing visual information received through the amblyopic eye. In particular, our  
518 observation that increased correlation persists across a range of stimulus intensities shown to the amblyopic eye  
519 suggests that V1 neurons may not fully engage in processing stimulus information received through an amblyopic  
520 eye. One well supported possibility is that the visual stimuli received through the amblyopic eye have a weaker  
521 influence in the visual cortex due to both single-neuron and network level changes following a shift in ocular  
522 dominance towards the fellow eye.

523 In the amblyopic animals of this study, the majority of the recorded V1 neurons preferentially responded  
524 to stimulus drive through the fellow eye, and there were few binocularly responsive neurons. Furthermore, we  
525 observed that the difference in correlated variability and firing rates between amblyopic and fellow eye stimulation  
526 was restricted to pairs of cells that had the same eye preference. Together, these results are consistent with a  
527 re-wiring scheme in which a substantial portion of the neurons lose amblyopic eye inputs but gain or retain fellow  
528 eye inputs following strabismus induction. Anatomically, the representation of the amblyopic eye in pairs of V1  
529 neurons could decline as a result of altered lateral connections in V1, from reduced thalamocortical projections

530 that carry amblyopic eye information, or both. Studies of horizontal connections in amblyopic macaques and cats  
531 have reported reduced connectivity between cells located in right and left ocular dominance columns in the  
532 superficial layers of V1 (*Tychsen & Burkhalter, 1992; Lowel & Singer, 1992*). In contrast, the structure of  
533 thalamocortical inputs remains largely normal in amblyopic monkeys (*Hendrickson et al 1987; Horton, Hocking,*  
534 *Kiorpes, 1996; Adams et al, 2013-2015; Fenstemaker et al., 1997*). However, even with structurally intact  
535 thalamocortical projections, the effectiveness of thalamocortical drive to V1 could be reduced specifically for  
536 inputs from the amblyopic eye due to changes in how the cortical architecture receives and processes those  
537 inputs. To that point, we recently described local circuit changes in V1, in particular, reduction in excitatory drive  
538 to amblyopic eye neurons resulting in a change in E/I balance, that could explain the abnormal response to  
539 contrast variation during amblyopic eye viewing (*Hallum et al., 2017; Shooner et al., 2015*). Overall we conclude  
540 that it is necessary to consider both the prevalence and functional connectivity of the neurons that reliably  
541 activate in response to each eye, in order to pinpoint why stimulus processing through the amblyopic eye is  
542 degraded.

543 When considering changes across the entire population of neurons, it is evident that the effect of  
544 amblyopia is heterogenous across the V1 population. For instance, although most neurons exhibited a higher  
545 level of correlations and lower firing rates for amblyopic eye stimulation, a subgroup of neurons retained normal  
546 responsivity and continued to respond well to stimulation of the amblyopic eye. Specifically, neuronal pairs with  
547 the highest firing rates did not show an increase in correlation compared to the same high firing neuronal pairs  
548 responding to fellow eye stimulation (Figs 5 and 7). This observation is consistent with prior reports that some  
549 neurons in amblyopic cortex retain normal response properties. For example, some neurons in amblyopic cortex  
550 in monkeys maintained high responsivity to high spatial frequencies while other neurons had altered responsivity  
551 (*Movshon et al., 1987; Kiorpes et al., 1998*). This co-existence of normally responsive and altered cells in  
552 amblyopic V1 highlights the importance of considering pairwise interactions in the context of the properties of  
553 the cells in each pair, which can reveal subgroups of neurons (and types of visual stimulus information) that are  
554 particularly affected.

### 555 ***Implications for behavior***

556 A number of studies suggest that correlated variability between sensory neurons might be especially  
557 important for encoding of stimulus information in populations of neurons (*Abbott & Dayan, 1999; Averbek,*



558 *Latham & Pouget 2006; Cohen & Maunsell 2009; Cohen & Kohn 2011*). Furthermore, there is some evidence  
559 for a direct link between changes in correlated variability and shifts in psychophysical performance (*Cohen &*  
560 *Maunsell 2009; Beaman & Dragoi 2017, Zohary et al., 1994*). Importantly, it's not just changes in the amount of  
561 correlated variability in a given network that matter for stimulus representation, but also specifically which  
562 neurons exhibit altered interactions. Here, we found that the increase in correlations between amblyopic and  
563 fellow eye stimulation is the highest for pairs of similarly tuned neurons. A common finding of theoretical and  
564 experimental studies is that an increase in amount of shared noise between similarly tuned neurons is detrimental  
565 for population coding (*Averbeck, Latham & Pouget 2006; Jeanne et al., 2013; Ecker et al., 2011*). Our results  
566 thus indicate that stimulus representation is degraded in populations of V1 neurons that process visual stimuli  
567 shown to the amblyopic eye, more than would be expected simply from the reduced responses observed in  
568 individual neurons.

569 Our decoding analysis demonstrates that, as expected, stimulus information is harder to read out from  
570 V1 population activity when amblyopic eye rather than the fellow, non-amblyopic eye provides the visual  
571 information. We found that classification accuracy was consistently reduced when decoding stimulus orientation  
572 from neural responses to amblyopic vs fellow eye stimulation. This result is very much in line with the idea that  
573 stimulus representation in V1 is impaired for amblyopic eye visual inputs, creating potential for downstream  
574 errors in visual information processing. Interestingly, amblyopic observers have global perceptual deficits that  
575 are not simply predicted by single neuron changes in V1 (*Kozma & Kiorpes, 2003*). For instance, strabismic  
576 amblyopes have impaired performance in contour integration, a task that requires mentally tracing a curve that  
577 is embedded in a noisy background (*Kozma & Kiorpes 2003; Levi & Rislove, 2007*). In this study we found a  
578 larger increase in correlations between similarly tuned neurons compared to neurons with dissimilar tuning during  
579 amblyopic eye stimulation. It is therefore possible that deficits in contour integration in amblyopia arise from  
580 decreased accuracy in coordination of neighboring, similarly oriented pieces of the contour in V1. Overall, our  
581 findings indicate that to more conclusively define the neurophysiological correlates of visual deficits in amblyopia,  
582 it is important to consider population-level processing of visual information and not just the properties of single  
583 neurons.

584

585

## 586 ***Theories for the neural basis of amblyopia***

587 Previous work provides evidence for several possible neurophysiological correlates of amblyopic visual  
588 deficits. Some well-studied hypotheses for the neural basis of amblyopia include 1) altered responsivity and  
589 tuning of single neurons in V1, 2) neural changes in visual areas downstream of V1, 3) reduced cortical  
590 representation of the amblyopic eye (“undersampling”) and 4) topographical jitter, or disorder in neural map of  
591 visual space (*Kiorpes et al., 1998; Kiorpes, 2006 & 2016; Levi, 2013; Wang et al., 2016*). In this study we found  
592 that the strength and pattern of functional interactions in pairs of neurons in the primary visual cortex was different  
593 when processing of amblyopic eye and fellow eye inputs. We conclude that abnormalities in visual information  
594 processing at the level of V1 neuron populations also likely contribute to amblyopic visual deficits. What remains  
595 to be explored is whether these changes in coordinated activity contribute to the amblyopic deficit directly, or do  
596 so by altering the mechanisms by which downstream areas might read out activity in primary visual cortex.

614 **References**

- 615 Abbott LF, Dayan P. The effect of correlated variability on the accuracy of a population code. *Neural Comput.*  
616 1999;11(1):91-101.
- 617 Adams DL, Economides JR, Sincich LC, Horton JC. Cortical metabolic activity matches the pattern of visual  
618 suppression in strabismus. *J Neurosci* 2013; 33(9):3752-9.
- 619 Adams DL, Economides JR, Horton JC. Contrasting effects of strabismic amblyopia on metabolic activity in  
620 superficial and deep layers of striate cortex. *J Neurophysiol.* 2015;113(9):3337-44.
- 621 Averbeck BB, Latham PE, Pouget A. Neural correlations, population coding and computation. *Nat Rev Neurosci.*  
622 2006;7(5):358-66.
- 623 Baker FH, Grigg P, von Noorden GK. Effects of visual deprivation and strabismus on the response of neurons  
624 in the visual cortex of the monkey, including studies on the striate and prestriate cortex in the normal animal.  
625 *Brain Research.* 1974; 66(2):185-208
- 626 Beaman CB, Eagleman SL, Dragoi V. Sensory coding accuracy and perceptual performance are improved  
627 during the desynchronized cortical state. *Nat Commun.* 2017;8(1):1308.
- 628 Bi H, Zhang B, Tao X, Harwerth RS, Smith EL, Chino YM. Neuronal responses in visual area V2 (V2) of macaque  
629 monkeys with strabismic amblyopia. *Cereb Cortex.* 2011;21(9):2033-45.
- 630 Blakemore C, Vital-durand F. Effects of visual deprivation on the development of the monkey's lateral geniculate  
631 nucleus. *J Physiol (Lond).* 1986;380:493-511.
- 632 Bradley A, Freeman RD. Contrast sensitivity in anisometropic amblyopia. *Invest Ophthalmol Vis Sci* 1981:  
633 21(3):467-76.
- 634 Chino YM, Shansky MS, Jankowski WL, Banser FA. Effects of rearing kittens with convergent strabismus on  
635 development of receptive-field properties in striate cortex neurons. *J Neurophysiol.* 1983;50(1):265-86.
- 636 Churchland MM, Yu BM, Cunningham JP, et al. Stimulus onset quenches neural variability: a widespread cortical  
637 phenomenon. *Nat Neurosci.* 2010;13(3):369-78.
- 638 Cohen MR, Maunsell JH. Attention improves performance primarily by reducing interneuronal correlations. *Nat*  
639 *Neurosci.* 2009;12(12):1594-600.
- 640 Cohen MR, Kohn A. Measuring and interpreting neuronal correlations. *Nat Neurosci.* 2011;14(7):811-9.
- 641 Cohen MR, Newsome WT. Context-dependent changes in functional circuitry in visual area MT. *Neuron.*  
642 2008;60(1):162-73.
- 643 Crawford ML, Harwerth RS, Chino YM, Smith EL. Binocularity in prism-reared monkeys. *Eye (Lond).* 1996;10 (Pt 2):161-6.
- 644
- 645 Crawford ML, Harwerth RS. Ocular dominance column width and contrast sensitivity in monkeys reared with  
646 strabismus or anisometropia. *Invest Ophthalmol Vis Sci.* 2004;45(9):3036-42.
- 647 Crawford ML, Von noorden GK. Concomitant strabismus and cortical eye dominance in young rhesus monkeys.  
648 *Trans Ophthalmol Soc U K.* 1979;99(3):369-74.
- 649 Crewther DP, Crewther SG. Neural site of strabismic amblyopia in cats: spatial frequency deficit in primary  
650 cortical neurons. *Exp Brain Res.* 1990;79(3):615-22.
- 651 Cumming BG, Nienborg H. Feedforward and feedback sources of choice probability in neural population  
652 responses. *Curr Opin Neurobiol.* 2016;37:126-132.
- 653 De valois RL, Yund EW, Hepler N. The orientation and direction selectivity of cells in macaque visual cortex.  
654 *Vision Res.* 1982;22(5):531-44.

- 655 Doiron B, Litwin-kumar A, Rosenbaum R, Ocker GK, Josić K. The mechanics of state-dependent neural  
656 correlations. *Nat Neurosci.* 2016;19(3):383-93.
- 657 Ecker AS, Berens P, Tolias AS, Bethge M. The effect of noise correlations in populations of diversely tuned  
658 neurons. *J Neurosci.* 2011;31(40):14272-83.
- 659 El-Shamayleh Y, Kiorpes L, Kohn A, Movshon JA. Visual motion processing by neurons in area MT of macaque  
660 monkeys with experimental amblyopia. *J Neurosci.* 2010;30(36):12198-209.
- 661 Farzin F, Norcia AM. Impaired visual decision-making in individuals with amblyopia. *J Vis.* 2011;11(14)
- 662 Fenstemaker SB, Kiorpes L, Movshon JA. Effects of experimental strabismus on the architecture of macaque  
663 monkey striate cortex. *J Comp Neurol.* 2001;438(3):300-17.
- 664 Foster KH, Gaska JP, Nagler M, Pollen DA. Spatial and temporal frequency selectivity of neurones in visual  
665 cortical areas V1 and V2 of the macaque monkey. *J Physiol (Lond).* 1985;365:331-63.
- 666 Greschner M, Shlens J, Bakolitsa C, et al. Correlated firing among major ganglion cell types in primate retina. *J*  
667 *Physiol (Lond).* 2011;589(Pt 1):75-86.
- 668 Gu Y, Liu S, Fetsch CR, et al. Perceptual learning reduces interneuronal correlations in macaque visual cortex.  
669 *Neuron.* 2011;71(4):750-61.
- 670 Hallum LE, Shooner C, Kumbhani RD, et al. Altered Balance of Receptive Field Excitation and Suppression in  
671 Visual Cortex of Amblyopic Macaque Monkeys. *J Neurosci.* 2017;37(34):8216-8226.
- 672 Hendrickson AE, Movshon JA, Eggers HM, Gizzi MS, Boothe RG, Kiorpes L. Effects of early unilateral blur on  
673 the macaque's visual system. II. Anatomical observations. *J Neurosci.* 1987;7(5):1327-39.
- 674 Hess RF, Howell ER. The threshold contrast sensitivity function in strabismic amblyopia: evidence for a two type  
675 classification. *Vision Res.* 1977;17(9):1049-55.
- 676 Horton JC, Hocking DR, Kiorpes L. Pattern of ocular dominance columns and cytochrome oxidase activity in a  
677 macaque monkey with naturally occurring anisometropic amblyopia. *Vis Neurosci.* 1997;14(4):681-9.
- 678 Hou C, Kim YJ, Lai XJ, Verghese P. Degraded attentional modulation of cortical neural populations in strabismic  
679 amblyopia. *J Vis.* 2016;16(3):16.
- 680 Hubel DH, Wiesel TN. Binocular interaction in striate cortex of kittens reared with artificial squint. *J Neurophysiol.*  
681 1965;28(6):1041-59.
- 682 Jeanne JM, Sharpee TO, Gentner TQ. Associative learning enhances population coding by inverting  
683 interneuronal correlation patterns. *Neuron.* 2013;78(2):352-63.
- 684 Kanitscheider I, Coen-cagli R, Pouget A. Origin of information-limiting noise correlations. *Proc Natl Acad Sci*  
685 *USA.* 2015;112(50):E6973-82.
- 686 Kelly RC, Smith MA, Samonds JM, Kohn A, Bonds AB, Movshon JA, Lee TS. Comparison of recordings from  
687 microelectrode arrays and single electrodes in the visual cortex. *J Neurosci.* 2007;27(2):261-4.
- 688 Kiorpes L. Visual processing in amblyopia: animal studies. *Strabismus.* 2006;14(1):3-10.
- 689 Kiorpes L. The Puzzle of Visual Development: Behavior and Neural Limits. *J Neurosci.* 2016;36(45):11384-  
690 11393.
- 691 Kiorpes L, Kiper DC, O'keefe LP, Cavanaugh JR, Movshon JA. Neuronal correlates of amblyopia in the visual  
692 cortex of macaque monkeys with experimental strabismus and anisometropia. *J Neurosci.* 1998;18(16):6411-  
693 24.
- 694 Kiorpes L, Tang C, Movshon JA. Factors limiting contrast sensitivity in experimentally amblyopic macaque  
695 monkeys. *Vision Res.* 1999;39(25):4152-60.

- 696 Kiorpes L, Tang C, Movshon JA. Sensitivity to visual motion in amblyopic macaque monkeys. *Vis Neurosci.* 2006;23(2):247-56.  
697
- 698 Kohn A, Coen-cagli R, Kanitscheider I, Pouget A. Correlations and Neuronal Population Information. *Annu Rev Neurosci.* 2016;39:237-56.  
699
- 700 Kohn A, Smith MA. Stimulus dependence of neuronal correlation in primary visual cortex of the macaque. *J Neurosci.* 2005;25(14):3661-73.  
701
- 702 König P, Engel AK, Löwel S, Singer W. Squint affects synchronization of oscillatory responses in cat visual cortex. *Eur J Neurosci.* 1993;5(5):501-8.  
703
- 704 Kozma P, Kiorpes L. Contour integration in amblyopic monkeys. *Vis Neurosci.* 2003;20(5):577-88.
- 705 Levay S, Wiesel TN, Hubel DH. The development of ocular dominance columns in normal and visually deprived monkeys. *J Comp Neurol.* 1980;191(1):1-51.  
706
- 707 Levi DM, Harwerth RS. Spatio-temporal interactions in anisometric and strabismic amblyopia. *Invest Ophthalmol Vis Sci.* 1977; 16(1):90-5.  
708
- 709 Levi DM, Yu C, Kuai SG, Rislove E. Global contour processing in amblyopia. *Vision Res.* 2007;47(4):512-24.
- 710 Levi DM. Linking assumptions in amblyopia. *Vis Neurosci.* 2013;30(5-6):277-87.
- 711 Löwel S, Singer W. Selection of intrinsic horizontal connections in the visual cortex by correlated neuronal activity. *Science.* 1992;255(5041):209-12.  
712
- 713 McKee SP, Levi DM, Movshon JA. The pattern of visual deficits in amblyopia. *J Vis.* 2003;3(5):380-405.
- 714 Meier K, Sum B, Giaschi D. Global motion perception in children with amblyopia as a function of spatial and temporal stimulus parameters. *Vision Res.* 2016;127:18-27.  
715
- 716 Mitchell JF, Sundberg KA, Reynolds JH. Spatial attention decorrelates intrinsic activity fluctuations in macaque area V4. *Neuron.* 2009;63(6):879-88.  
717
- 718 Movshon JA, Eggers HM, Gizzi MS, Hendrickson AE, Kiorpes L, Boothe RG. Effects of early unilateral blur on the macaque's visual system. III. Physiological observations. *J Neurosci.* 1987;7(5):1340-51.  
719
- 720 Ni AM, Ruff DA, Alberts JJ, Symmonds J, Cohen MR. Learning and attention reveal a general relationship between population activity and behavior. *Science.* 2018;359(6374):463-465.  
721
- 722 Pham A, Carrasco M, Kiorpes L. Endogenous attention improves perception in amblyopic macaques. *J Vis.* 2018;18(3):11.  
723
- 724 Reid RC, Alonso JM. Specificity of monosynaptic connections from thalamus to visual cortex. *Nature.* 1995;378(6554):281-4.  
725
- 726 Roelfsema PR, König P, Engel AK, Sireteanu R, Singer W. Reduced synchronization in the visual cortex of cats with strabismic amblyopia. *Eur J Neurosci.* 1994;6(11):1645-55.  
727
- 728 Rousche PJ, Normann RA. A method for pneumatically inserting an array of penetrating electrodes into cortical tissue. *Ann Biomed Eng.* 1992;20(4):413-22.  
729
- 730 Ruff DA, Cohen MR. Stimulus Dependence of Correlated Variability across Cortical Areas. *J Neurosci.* 2016;36(28):7546-56.  
731
- 732 Schröder JH, Fries P, Roelfsema PR, Singer W, Engel AK. Ocular dominance in extrastriate cortex of strabismic amblyopic cats. *Vision Res.* 2002;42(1):29-39.  
733
- 734 Shadlen MN, Newsome WT. The variable discharge of cortical neurons: implications for connectivity, computation, and information coding. *J Neurosci.* 1998;18(10):3870-96.  
735

- 736 Shoham S, Fellows MR, Normann RA. Robust, automatic spike sorting using mixtures of multivariate t-  
737 distributions. *J Neurosci Methods*. 2003;127(2):111-22.
- 738 Shooner C, Hallum LE, Kumbhani RD, et al. Population representation of visual information in areas V1 and V2  
739 of amblyopic macaques. *Vision Res*. 2015;114:56-67.
- 740 Smith EL, Chino YM, Ni J, Cheng H, Crawford ML, Harwerth RS. Residual binocular interactions in the striate  
741 cortex of monkeys reared with abnormal binocular vision. *J Neurophysiol*. 1997;78(3):1353-62.
- 742 Smith MA, Kohn A (2008) Spatial and temporal scales of neuronal correlation in primary visual cortex. *J Neurosci*,  
743 28: 12591–12603.
- 744 Smith MA, Bair W, Movshon JA. Signals in macaque striate cortical neurons that support the perception of glass  
745 patterns. *J Neurosci*. 2002;22(18):8334-45.
- 746 Smith MA, Sommer MA. Spatial and temporal scales of neuronal correlation in visual area V4. *J Neurosci*.  
747 2013;33(12):5422-32.
- 748 Snyder AC, Morais MJ, Smith MA (2016) Dynamics of excitatory and inhibitory networks are differentially altered  
749 by selective attention. *J Neurophysiol*, 116:1807-1820.
- 750 Tolhurst DJ, Movshon JA, Dean AF. The statistical reliability of signals in single neurons in cat and monkey  
751 visual cortex. *Vision Res*. 1983;23(8):775-85.
- 752 Tychsen L, Burkhalter, A (1997) Nasotemporal asymmetries in V1: Ocular dominance columns of infant, adult,  
753 and strabismic macaque monkeys. *J. Comp. Neurol*, 388: 32-46.
- 754 Wang H, Crewther SG, Liang M, et al. Impaired Activation of Visual Attention Network for Motion Saliency Is  
755 Accompanied by Reduced Functional Connectivity between Frontal Eye Fields and Visual Cortex in Strabismic  
756 Amblyopia. *Front Hum Neurosci*. 2017;11:195.
- 757 Zohary E, Shadlen MN, Newsome WT. Correlated neuronal discharge rate and its implications for  
758 psychophysical performance. *Nature*. 1994;370(6485):140-3.
- 759
- 760
- 761
- 762
- 763
- 764
- 765
- 766
